# Supplementary material for: Exploring the Role of Different Cell-Death-Related Genes in Sepsis Diagnosis Using a Machine Learning Algorithm
Source: Int J Mol Sci. 2023 Sep 29;24(19):14720. doi: 10.3390/ijms241914720 (PMC10572834; doi:10.3390/ijms241914720)
Supplement: Supplementary file 1 [file ijms-24-14720-s001.zip › ijms-2561747-supplementary.pdf]

# Supplementary material

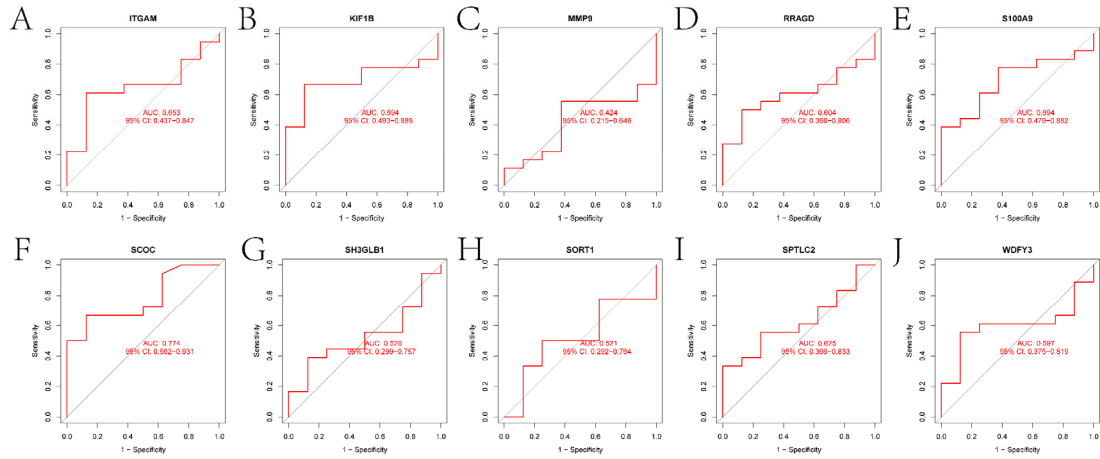

**Figure S1.** The verification results of diagnosis-related genes in the internal test set.

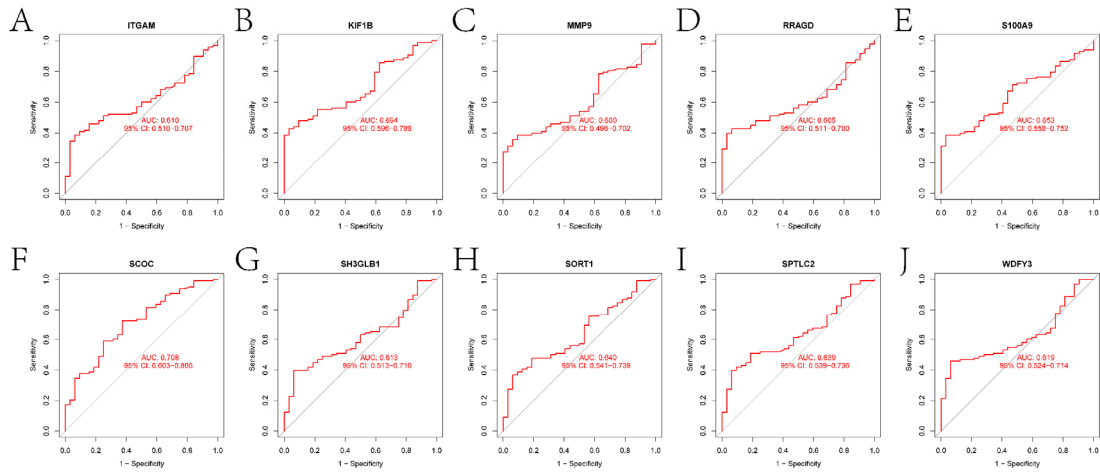

**Figure S2.** The verification results of diagnosis-related genes in external test set.

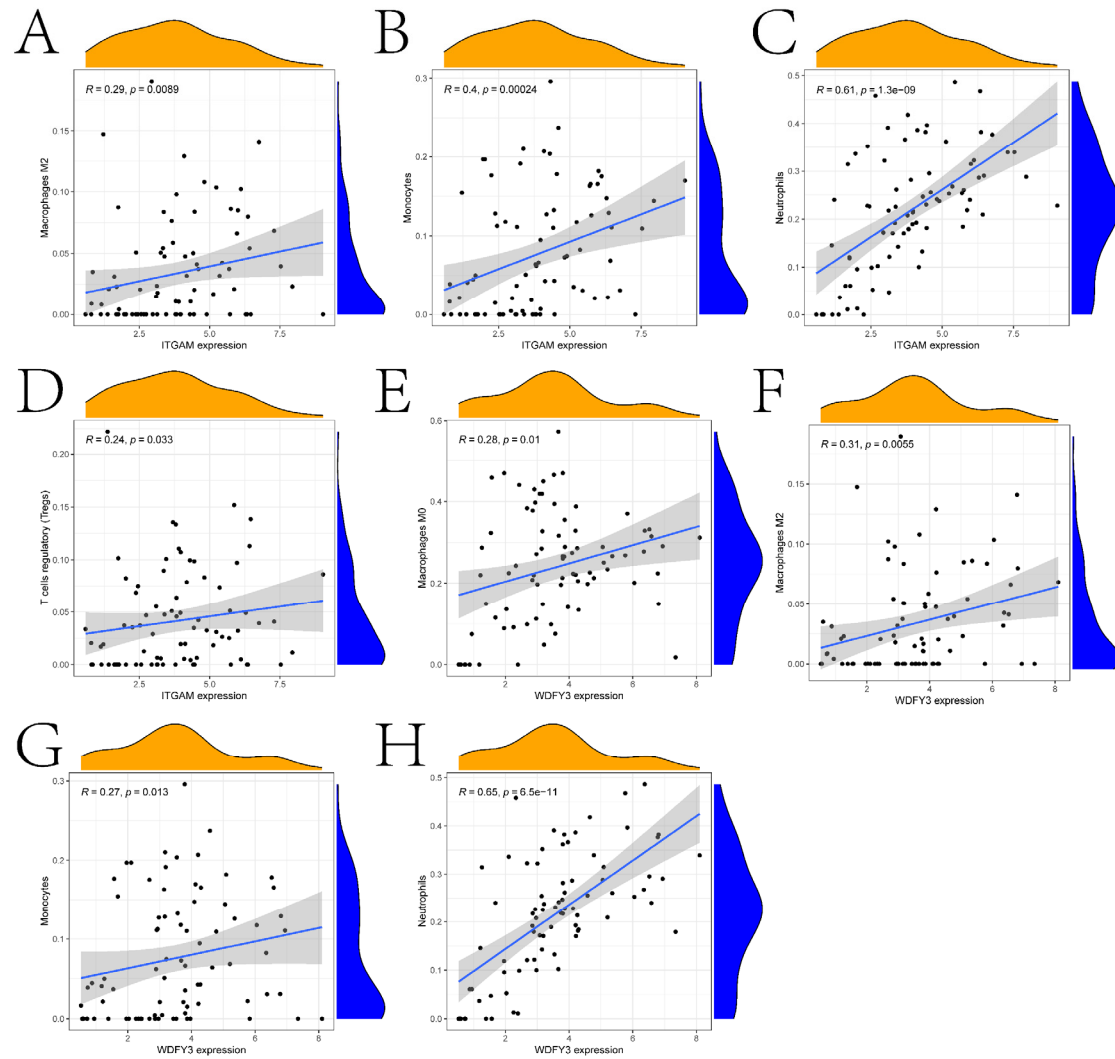

**Figure S3.** Correlation analysis between the last five diagnosis-related genes and immune cells. A-D gives the scatter diagram of the correlation between ITGAM and immune cells. E-I gives the scatter plot of correlation between WDFY3 and immune cells.

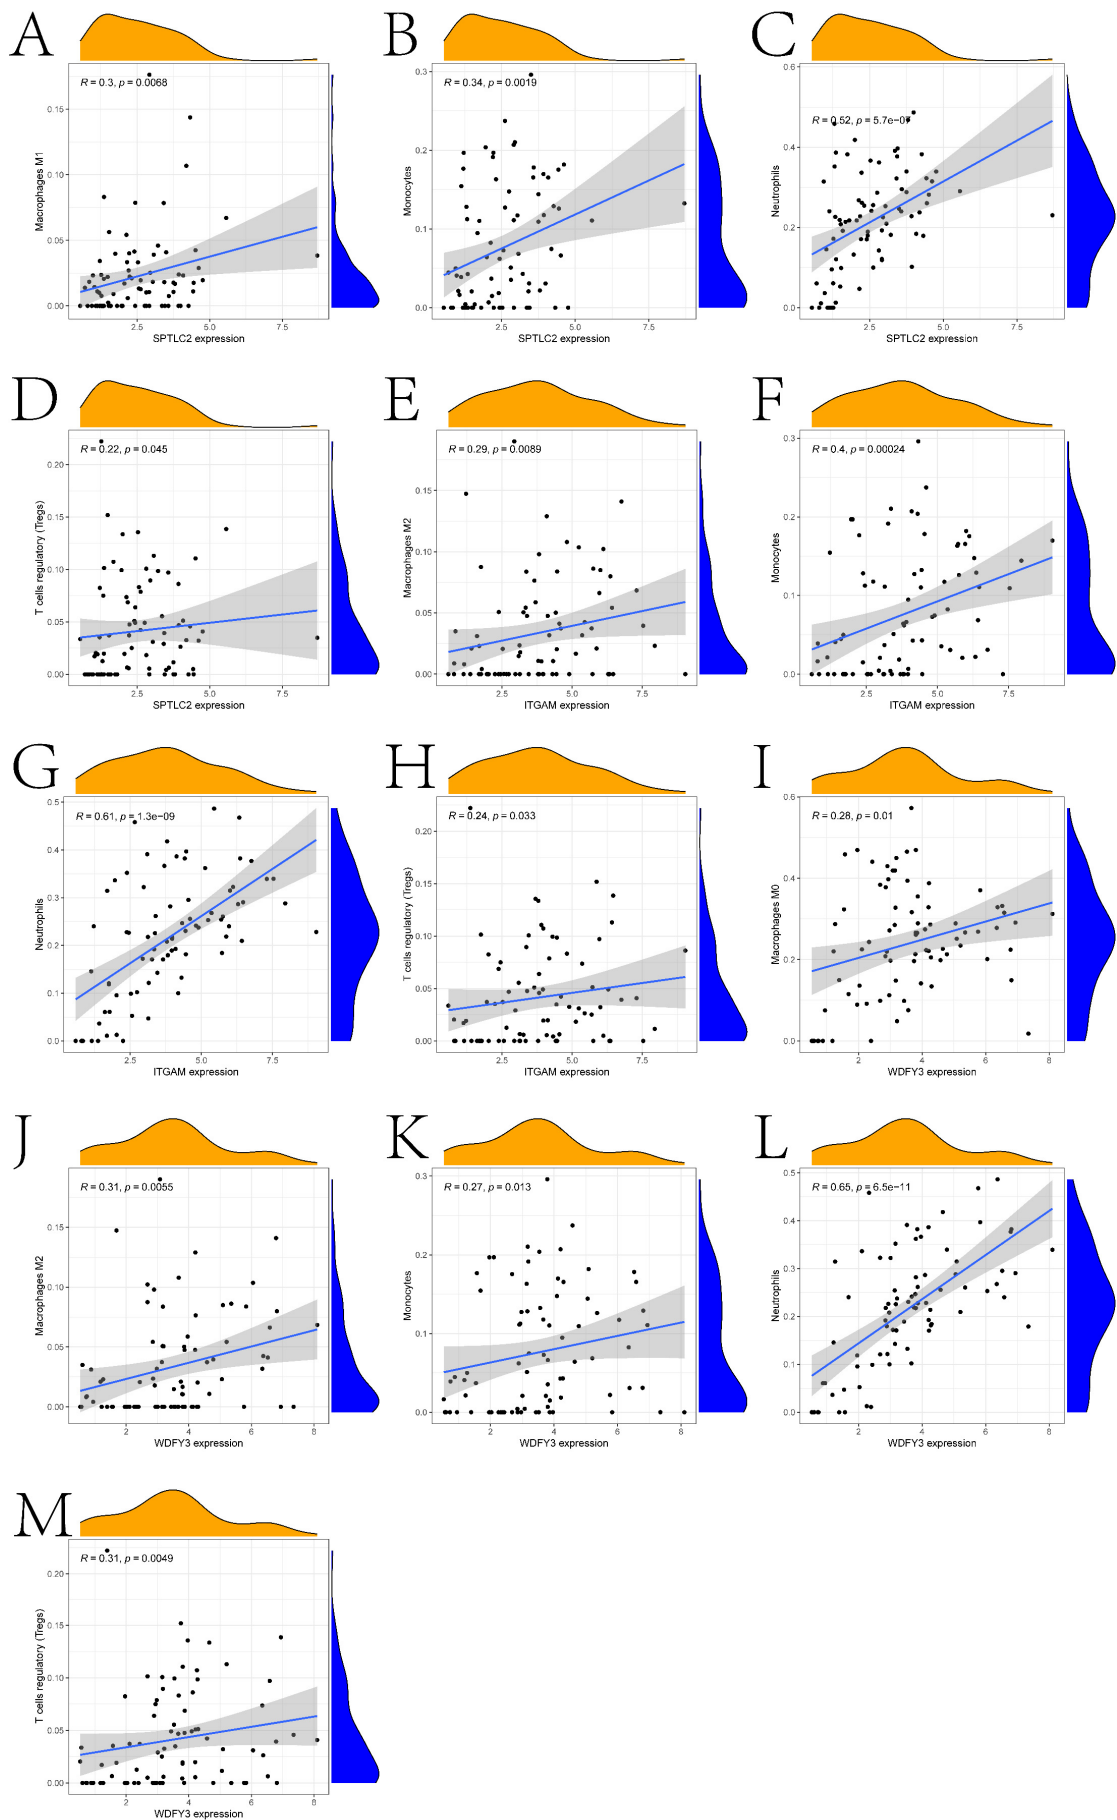

**Figure S4.** A-D gives the scatter plot of the correlation between SPTLC2 and immune cells. E-H gives the scatter plot of correlation between ITGAM and immune cells. I-M gives the scatter plot of correlation between WDFY3 and immune cells.

**Table S1.** Demographic information for the Sepsis group and the Control group.

| Parameters                                     | Control   | Sepsis    | <i>P</i> |
|------------------------------------------------|-----------|-----------|----------|
| <b>Gender</b>                                  |           |           | 0.614    |
| Male                                           | 4         | 3         |          |
| Female                                         | 4         | 5         |          |
| <b>Ages</b>                                    |           |           | N        |
| ≥60                                            | 1         | 5         |          |
| 18-60                                          | 7         | 3         |          |
| ≤18                                            | 0         | 0         |          |
| <b>Infection Source</b>                        |           |           | N        |
| Lung                                           | 0         | 4         |          |
| Urinary tract                                  | 0         | 1         |          |
| Skin or Soft tissues                           | 0         | 0         |          |
| Other                                          | 0         | 3         |          |
| <b>Comorbidities</b>                           |           |           | 0.001    |
| Yes                                            | 0         | 7         |          |
| No                                             | 8         | 1         |          |
| <b>ΔSOFA Scores</b>                            |           |           | 0.001    |
| 0-2                                            | 8         | 0         |          |
| ≥2                                             | 0         | 8         |          |
| <b>Lactate levels<sup>a</sup><br/>(mmol/L)</b> | 0.81±0.33 | 3.65±2.45 | 0.001    |

<sup>a</sup> Lactate levels: Mean ± standard deviation, measurement time point: Sepsis group: within 24h after diagnosis of sepsis; Control group: the day of physical examination.
